# Supplementary material
Source: PubMed Central journal article supplement (PMC5528307)
Supplement: MOL2-5-399-s001.pdf [file MOL2-5-399-s001.pdf]

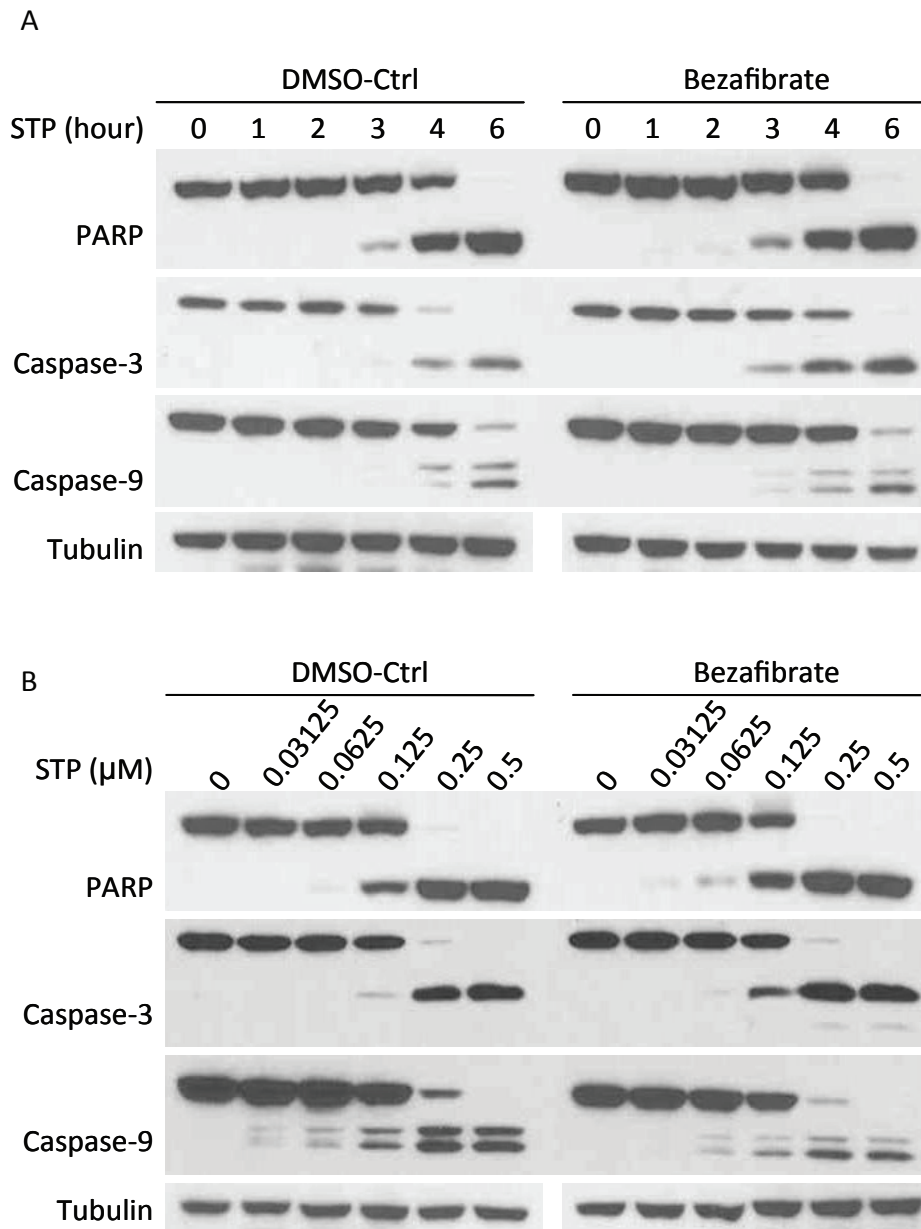

Supplemental Figure S1: Western blotting of Staurosporine induced apoptosis, time- and dose-dependent. A, Time-course of Staurosporine-induced apoptosis in HeLa cells. B, Dose-course of Staurosporine-induced apoptosis in HeLa cells. Antibodies against PARP, Caspase-3 and Caspase-9 were used to detect apoptosis. Antibody against Tubulin was used as a loading control.
