# Supplementary material
Source: PubMed Central journal article supplement (PMC5528307)
Supplement: MOL2-5-399-s002.pdf [file MOL2-5-399-s002.pdf]

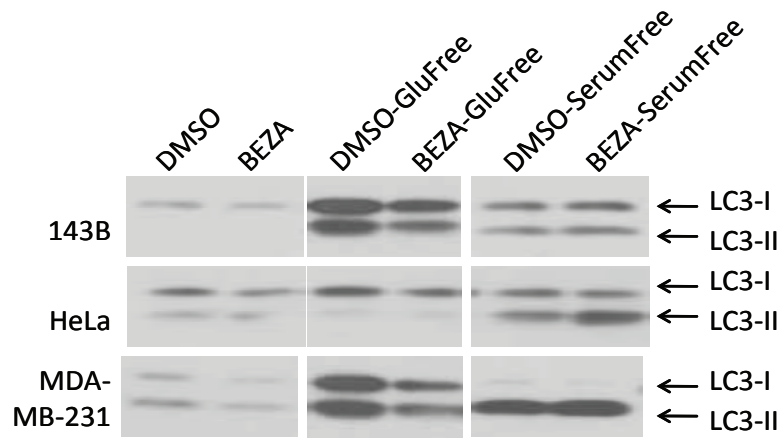

Supplemental Figure S2: Effect of bezafibrate treatment on autophagy, induced by glucose starvation and serum deprivation. Western blotting of control cells, cells in glucose starvation, and cells under serum deprivation. LC3B antibody was used to detect levels of autophagy in different cell lines.
